# Supplementary material for: Integrated Dissection of lncRNA-miRNA-mRNA Pairs and Potential Regulatory Role of lncRNA PCAT19 in Lung Adenocarcinoma
Source: Front Genet. 2022 Jan 12;12:765275. doi: 10.3389/fgene.2021.765275 (PMC8790230; doi:10.3389/fgene.2021.765275)
Supplement: Supplementary file 3 [file Table9.XLSX]

## Sheet: 0
	Well	Fluor	Target	Content	Sample	Biological Set Name	Cq	Cq Mean	Cq Std. Dev	Starting Quantity (SQ)	Log Starting Quantity	SQ Mean	SQ Std. Dev	Set Point	Well Note		Cq
	A01	SYBR	PCAT19	Unkn	tumor	1T	24.9369	24.9369	0				0	60
	A02	SYBR	PCAT19	Unkn	tumor	1T	25.7476	25.7476	0				0	60
	A03	SYBR	PCAT19	Unkn	tumor	1T	25.9476	25.9476	0				0	60
	A04	SYBR	PCAT19	Unkn	Adjacent non-tumor	1C	26.2727	26.2727	0				0	60
	A05	SYBR	PCAT19	Unkn	Adjacent non-tumor	1C	26.3847	26.3847	0				0	60
	A06	SYBR	PCAT19	Unkn	Adjacent non-tumor	1C	26.4975	26.4975	0				0	60
	A07	SYBR	PCAT19	Unkn	tumor	2T	25.2729	25.2729	0			0	0	60
	A08	SYBR	PCAT19	Unkn	tumor	2T	25.4847	25.4847	0			0	0	60
	A09	SYBR	PCAT19	Unkn	tumor	2T	24.9275	24.9275	0				0	60
	A10	SYBR	PCAT19	Unkn	Adjacent non-tumor	2C	25.2558	25.2558	0			0	0	60
	A11	SYBR	PCAT19	Unkn	Adjacent non-tumor	2C	26.4844	26.4844	0			0	0	60
	A12	SYBR	PCAT19	Unkn	Adjacent non-tumor	2C	25.1947	25.1947	0			0	0	60
	B01	SYBR	PCAT19	Unkn	tumor	3T	25.2848	25.2848	0				0	60
	B02	SYBR	PCAT19	Unkn	tumor	3T	25.9274	25.9274	0				0	60
	B03	SYBR	PCAT19	Unkn	tumor	3T	25.2947	25.2947	0				0	60
	B04	SYBR	PCAT19	Unkn	Adjacent non-tumor	3C	26.2769	26.2769	0				0	60
	B05	SYBR	PCAT19	Unkn	Adjacent non-tumor	3C	25.9764	25.9764	0				0	60
	B06	SYBR	PCAT19	Unkn	Adjacent non-tumor	3C	25.3847	25.3847	0				0	60
	B07	SYBR	PCAT19	Unkn	tumor	4T	26.6503	26.6503	0			0	0	60
	B08	SYBR	PCAT19	Unkn	tumor	4T	26.3948	26.3948	0			0	0	60
	B09	SYBR	PCAT19	Unkn	tumor	4T	27.9747	27.9747	0				0	60
	B10	SYBR	PCAT19	Unkn	Adjacent non-tumor	4C	26.313	26.313	0			0	0	60
	B11	SYBR	PCAT19	Unkn	Adjacent non-tumor	4C	28.9475	28.9475	0			0	0	60
	B12	SYBR	PCAT19	Unkn	Adjacent non-tumor	4C	25.0847	25.0847	0			0	0	60
	C01	SYBR	PCAT19	Unkn	tumor	5T	25.0332	25.0332	0				0	60
	C02	SYBR	PCAT19	Unkn	tumor	5T	26.3947	26.3947	0				0	60
	C03	SYBR	PCAT19	Unkn	tumor	5T	26.9736	26.9736	0				0	60
	C04	SYBR	PCAT19	Unkn	Adjacent non-tumor	5C	24.1165	24.1165	0				0	60
	C05	SYBR	PCAT19	Unkn	Adjacent non-tumor	5C	25.9846	25.9846	0				0	60
	C06	SYBR	PCAT19	Unkn	Adjacent non-tumor	5C	25.9475	25.9475	0				0	60
	C07	SYBR	PCAT19	Unkn	tumor	6T	27.682	27.682	0			0	0	60
	C08	SYBR	PCAT19	Unkn	tumor	6T	27.9847	27.9847	0			0	0	60
	C09	SYBR	PCAT19	Unkn	tumor	6T	28.0845	28.0845	0				0	60
	C10	SYBR	PCAT19	Unkn	Adjacent non-tumor	6C	30.1101	30.1101	0			0	0	60
	C11	SYBR	PCAT19	Unkn	Adjacent non-tumor	6C	25.9837	25.9837	0			0	0	60
	C12	SYBR	PCAT19	Unkn	Adjacent non-tumor	6C	26.7646	26.7646	0			0	0	60
	D01	SYBR	PCAT19	Unkn	tumor	7T	26.2394	26.2394	0				0	60
	D02	SYBR	PCAT19	Unkn	tumor	7T	27.8365	27.8365	0				0	60
	D03	SYBR	PCAT19	Unkn	tumor	7T	26.5746	26.5746	0				0	60
	D04	SYBR	PCAT19	Unkn	Adjacent non-tumor	7C	23.3062	23.3062	0				0	60
	D05	SYBR	PCAT19	Unkn	Adjacent non-tumor	7C	25.4947	25.4947	0				0	60
	D06	SYBR	PCAT19	Unkn	Adjacent non-tumor	7C	26.9475	26.9475	0				0	60
	D07	SYBR	PCAT19	Unkn	tumor	8T	25.2974	25.2974	0			0	0	60
	D08	SYBR	PCAT19	Unkn	tumor	8T	25.9449	25.9449	0			0	0	60
	D09	SYBR	PCAT19	Unkn	tumor	8T	25.9574	25.9574	0				0	60
	D10	SYBR	PCAT19	Unkn	Adjacent non-tumor	8C	26.2973	26.2973	0			0	0	60
	D11	SYBR	PCAT19	Unkn	Adjacent non-tumor	8C	23.8475	23.8475	0			0	0	60
	D12	SYBR	PCAT19	Unkn	Adjacent non-tumor	8C	25.1937	25.1937	0			0	0	60
	E01	SYBR	PCAT19	Unkn	tumor	9T	28.7704	28.7704	0				0	60
	E02	SYBR	PCAT19	Unkn	tumor	9T	29.9364	29.9364	0				0	60
	E03	SYBR	PCAT19	Unkn	tumor	9T	27.9465	27.9465	0				0	60
	E04	SYBR	PCAT19	Unkn	Adjacent non-tumor	9C	28.8308	28.8308	0				0	60
	E05	SYBR	PCAT19	Unkn	Adjacent non-tumor	9C	26.3745	26.3745	0				0	60
	E06	SYBR	PCAT19	Unkn	Adjacent non-tumor	9C	26.8475	26.8475	0				0	60
	E07	SYBR	PCAT19	Unkn	tumor	10T	29.4593	29.4593	0			0	0	60
	E08	SYBR	PCAT19	Unkn	tumor	10T	28.3874	28.3874	0			0	0	60
	E09	SYBR	PCAT19	Unkn	tumor	10T	28.9736	28.9736	0				0	60
	E10	SYBR	PCAT19	Unkn	Adjacent non-tumor	10C	27.4117	27.4117	0			0	0	60
	E11	SYBR	PCAT19	Unkn	Adjacent non-tumor	10C	27.8474	27.8474	0			0	0	60
	E12	SYBR	PCAT19	Unkn	Adjacent non-tumor	10C	26.9475	26.9475	0			0	0	60
	F01	SYBR	PCAT19	Unkn	tumor	11T	27.682	27.682	0				0	60
	F02	SYBR	PCAT19	Unkn	tumor	11T	29.9375	29.9375	0				0	60
	F03	SYBR	PCAT19	Unkn	tumor	11T	28.9285	28.9285	0				0	60
	F04	SYBR	PCAT19	Unkn	Adjacent non-tumor	11C	26.1101	26.1101	0				0	60
	F05	SYBR	PCAT19	Unkn	Adjacent non-tumor	11C	27.9477	27.9477	0				0	60
	F06	SYBR	PCAT19	Unkn	Adjacent non-tumor	11C	27.4975	27.4975	0				0	60
	F07	SYBR	PCAT19	Unkn	tumor	12T	29.3062	29.3062	0			0	0	60
	F08	SYBR	PCAT19	Unkn	tumor	12T	29.0285	29.0285	0			0	0	60
	F09	SYBR	PCAT19	Unkn	tumor	12T	29.9747	29.9747	0				0	60
	F10	SYBR	PCAT19	Unkn	Adjacent non-tumor	12C	26.2394	26.2394	0			0	0	60
	F11	SYBR	PCAT19	Unkn	Adjacent non-tumor	12C	26.9575	26.9575	0			0	0	60
	F12	SYBR	PCAT19	Unkn	Adjacent non-tumor	12C	27.0827	27.0827	0			0	0	60
	G01	SYBR	PCAT19	Unkn	tumor	13T	29.2973	29.2973	0				0	60
	G02	SYBR	PCAT19	Unkn	tumor	13T	29.1747	29.1747	0				0	60
	G03	SYBR	PCAT19	Unkn	tumor	13T	28.9374	28.9374	0				0	60
	G04	SYBR	PCAT19	Unkn	Adjacent non-tumor	13C	26.2974	26.2974	0				0	60
	G05	SYBR	PCAT19	Unkn	Adjacent non-tumor	13C	26.9375	26.9375	0			0	0	60
	G06	SYBR	PCAT19	Unkn	Adjacent non-tumor	13C	26.9476	26.9476	0			0	0	60
	G07	SYBR	PCAT19	Unkn	tumor	14T	28.0922	28.0922	0				0	60
	G08	SYBR	PCAT19	Unkn	tumor	14T	28.9475	28.9475	0			0	0	60
	G09	SYBR	PCAT19	Unkn	tumor	14T	28.9375	28.9375	0				0	60
	G10	SYBR	PCAT19	Unkn	Adjacent non-tumor	14C	25.7655	25.7655	0			0	0	60
	G11	SYBR	PCAT19	Unkn	Adjacent non-tumor	14C	25.9275	25.9275	0			0	0	60
	G12	SYBR	PCAT19	Unkn	Adjacent non-tumor	14C	29.9757	29.9757	0			0	0	60
	H01	SYBR	PCAT19	Unkn	tumor	15T	30.2973	30.2973	0				0	60
	H02	SYBR	PCAT19	Unkn	tumor	15T	30.8247	30.8247	0				0	60
	H03	SYBR	PCAT19	Unkn	tumor	15T	29.9374	29.9374	0				0	60
	H04	SYBR	PCAT19	Unkn	Adjacent non-tumor	15C	27.2974	27.2974	0			0	0	60
	H05	SYBR	PCAT19	Unkn	Adjacent non-tumor	15C	27.8475	27.8475	0			0	0	60
	H06	SYBR	PCAT19	Unkn	Adjacent non-tumor	15C	26.0973	26.0973	0			0	0	60
	H07	SYBR	PCAT19	Unkn	tumor	16T	27.8642	27.8642	0			0	0	60
	H08	SYBR	PCAT19	Unkn	tumor	16T	27.9375	27.9375	0			0	0	60
	H09	SYBR	PCAT19	Unkn	tumor	16T	27.9375	27.9375	0				0	60
	H10	SYBR	PCAT19	Unkn	Adjacent non-tumor	16C	24.1808	24.1808	0			0	0	60
	H11	SYBR	PCAT19	Unkn	Adjacent non-tumor	16C	24.9476	24.9476	0			0	0	60
	H12	SYBR	PCAT19	Unkn	Adjacent non-tumor	16C	25.2937	25.2937	0			0	0	60

## Sheet: Run Information
File Name	20210914_QRT251_0915_2_1.pcrd
Created By User
Notes
ID
Run Started	09/14/2021 08:50:19 UTC
Run Ended	09/14/2021 10:11:38 UTC
Sample Vol	15
Lid Temp	105
Protocol File Name	Unknown.prcl
Plate Setup File Name	DefaultPlate.pltd
Base Serial Number	CT024082
Optical Head Serial Number
CFX Manager Version	3.1.1517.0823.
